# Supplementary material for: Cardiovascular disease risk in patients with hepatitis C infection: Results from two general population health surveys in Canada and the United States (2007-2017)
Source: PubMed Central journal article supplement (PMC6291240; doi:10.1371/journal.pone.0208839), 2018-12-12
Supplement: pone.0208839.s001.pdf [file pone.0208839.s001.pdf]

**Cardiovascular disease risk in patients with hepatitis C infection:  
Results from two general population health surveys in Canada and the United  
States (2007-2017)**

Alaa Badawi, Giancarlo Di Giuseppe, Paul Arora

**Supplementary Materials**

**S1 Table.** Number of hepatitis C virus (HCV) infected patients stratified by the method of HCV detection\*.

| Study population | Antibody Testing | RNA Testing  |              |              |
|------------------|------------------|--------------|--------------|--------------|
|                  |                  | Positive (%) | Negative (%) | Not done (%) |
| NHANES (n=326)   | Positive         | 167 (51.2)   | 48 (14.7)    | 22 (6.8)     |
|                  | Negative         |              |              |              |
|                  | Indeterminant    | 2 (0.6)      |              |              |
|                  | Not done         | 87 (26.7)    |              |              |
| CHMS (n=87)      | Positive         | 14 (16.1)    | 7 (8.0)      | 66 (75.9)    |
|                  | Negative         |              |              |              |
|                  | Indeterminant    |              |              |              |
|                  | Not done         |              |              |              |

\*Empty cells represent no sample in this category.
